# Supplementary material
Source: publisher figshare collection journal article supplement (https://springernature.figshare.com/articles/dataset/_/27925158)
Supplement: Supplementary file 1 [file 1]

## Sheet: 5A
5A

## Sheet: 5B
5B

## Sheet: 5C
5C
	WT NTC	WT siRNF4	T208A NTC	T208A siRNF4
	67626.7	780951	431340	264969
	76672.3	78229.4	73571.7	59970.2
	77229.7	88093	74606.1	93914.7
	78434.1	89654.6	75911.2	122887
	79573.4	98831.2	81689	127678
	80190.7	102682	83610.4	132759
	80545.6	105435	93429.4	146916
	82254.1	128168	95783.6	154462
	82301.7	135414	99361.5	155850				Dunn's multiple comparisons test	Mean rank diff.	Significant?	Summary	Adjusted P Value
	85878	140196	121776	166694				WT NTC vs. WT siRNF4	-70.9	Yes	**	0.001569	A-B
	93575.3	142321	132052	175703				WT NTC vs. T208A NTC	-145.1	Yes	****	8.62388e-14	A-C
	95182.5	148016	133680	182798				WT NTC vs. T208A siRNF4	-145.1	Yes	****	9.06497e-15	A-D
	98335.1	162688	141824	220236				WT siRNF4 vs. T208A NTC	-74.17	Yes	**	0.001432	B-C
	98419	173367	143324	221907				WT siRNF4 vs. T208A siRNF4	-74.17	Yes	***	0.000899	B-D
	98665.9	173821	153332	241233				T208A NTC vs. T208A siRNF4	-0.005185	No	ns	>0.999999	C-D
	98740.2	173948	174403	252133
	105777	181556	191664	258396
	108658	183514	195814	275189
	110556	201843	198594	276976
	113172	207869	201262	294440
	114172	208664	201333	303785
	117478	210260	206221	306792
	120136	230161	210142	341352
	120769	236723	228721	349938
	121074	237153	257184	398603
	124133	244486	257908	400200
	126418	247638	275446	404711
	130841	248012	323141	405010
	132205	259440	331294	411673
	135381	281444	336520	424318
	136859	289664	357508	467614
	137182	340270	362362	476364
	138417	344274	364598	479773
	138980	349587	393300	504514
	140291	358860	418975	535505
	146723	361124	428746	542036
	148962	364885	464920	553750
	155164	384465	491389	572580
	158237	404854	496958	609221
	159826	411673	513663	611559
	162483	447773	528021	632885
	163153	502464	556799	651627
	165198	509662	588303	679674
	169770	518001	616590	722810
	173610	606080	624519	733204
	181718	768684	643901	757495
	186980	824758	705127	804347
	189713	904268	710793	817272
	199329	1.04741e+06	780675	885923
	205453	1.07383e+06	795156	930910
	211291	1.08033e+06	817988	964299
	215889	1.20124e+06	988692	1.0091e+06
	216340	1.37675e+06	1.00244e+06	1.01806e+06
	224447	3.75005e+06	1.08987e+06	1.03036e+06
	224573	3.95363e+06	1.10158e+06	1.04074e+06
	236346	209896	1.33469e+06	1.04448e+06
	255777	803134	1.35157e+06	1.22495e+06
	260552	440882	1.46272e+06	1.34215e+06
	264053	346058	1.68739e+06	1.41259e+06
	270118	88884.7	2.12119e+06	1.5349e+06
	296342	112592	2.13692e+06	1.70319e+06
	297708	511789	2.16074e+06	1.72785e+06
	302013	675386	2.45227e+06	1.91741e+06
	302716	2228388	2.81239e+06	2.03036e+06
	311331	3229365	5.0678e+06	2.04175e+06
	332444	276882	5.62549e+06	2.07983e+06
	337576	165905	202983	2.08232e+06
	339683	1154094	157571	2.29519e+06
	359426	110810	223987	2.35824e+06
	381127	668786	250013	2.42861e+06
	402787	146463	135226	2.72908e+06
	412403	111601	158224	3.05514e+06
	456205	118647	610104	3.377e+06
	515142	195118	336690	3.56072e+06
	527044	388350	356464	3.71099e+06
	531814	77286.8	1762370	4.58371e+06
	671250	88538.1	3878515	7.81355e+06
	835229	291655	3708461	2292475
	907126	109177	4898160	1716138
	953822	212148	445937	667663
	1.35976e+06	426785	399891	621882
	2.36901e+06	55883.7	113940	2353434
	3.41312e+06	101690	1351226	2500401
	175367	226152	553485	412213
	76377.3	187913	687728	243631
	59522.2	288784	419554	472665
	101902	127117	4338953	170543
	109789	277416	3681588	122515
	71476.3	369573	2107961	335169
	87011.9	435781	2104933	128623
	174295	343324	165251	488810
	116457	319126	1011917	535901
	154267	421253	4358131	507843
	348959	1177206	3761197	100215
	309640	293952	1022182	108729
	544101	159966	2600602	4977560
	202008	207855	248293	5124637
	197934	313632	574423	95134.6
	769482	166904	483777	1767903
	1310050	165519	208495	1175877
	236445	121100	265249	1243235
	441183	149664	698115	596320
	1197487	778602	125475	141556
	100214	450484	264103	236397
	281277	920226	242071	176664
	211582	251399	4838982	1146961
	172375	593553	874643	1159883
	84470.6	154051	656545	907301
	144646	361302	1188140	601315
	113408	586969	1034518	527801
	286006	361902	1457407	340222
	106928	332208	1135019	1205723
	341046	246532	137523	2388740
	331389	1365704	159753	2123389
	191274	399961	1284867	114313
	112323	259127	541546	121102
	247207		1545295	129625
	157858		1331614	299834
	108176		1124009	204136
	151060		183979	209823
	123317		196874	893697
	180809		2574254	507954
	381436		5164992	1219668
	1081520		362588	1311497
	128026		358057	115796
	169198		876810	69850.4
	562884		240034	220286
	1110031		1525037	169068
	273580		1354959	2367656
	129782			591612
	144510			1315710
	122756			76469.6
	182856			967521
	329332			950868
	204986			654452
	129687			693289
	88112.8			141607
	107046			80972.7
	106293			108175
	71107.4			53514
	175438			78622.8
	67142.4			460488
	1462052			286222
	106787			171913
	132521			2191718
	65195.2			1641190
	67178.1			98259.8
	655256			129902
	386434
	135770
	429696
	2703745
	759504

## Sheet: 5D
5D

## Sheet: 5F
5F
	WT	WT+VCPi	T208A	T208A+VCPi
	274345	549610	365731	361041
	278078	659928	533916	426568
	290412	691310	537561	462789
	370344	708064	599487	497718
	432341	715445	655853	593639
	484885	855829	697390	693090
	489673	1009583	753182	726309
	535378	1036551	801189	776690			Dunn's multiple comparisons test	Mean rank diff.	Significant?	Summary	Adjusted P Value
	592126	1225915	816212	794434			WT vs. WT+VCPi	-140.6	Yes	****	6.82087e-11	A-B
	619700	1228406	851946	795699			WT vs. T208A	-172	Yes	****	1.02712e-18	A-C
	637467	1480911	980411	881260			WT vs. T208A+VCPi	-154.3	Yes	****	1.6383e-15	A-D
	660036	1570997	999393	897619			WT+VCPi vs. T208A	-31.36	No	ns	0.688301	B-C
	684574	1600236	1026327	901836			WT+VCPi vs. T208A+VCPi	-13.7	No	ns	>0.999999999999999	B-D
	690273	1627124	1044777	990388			T208A vs. T208A+VCPi	17.66	No	ns	>0.999999999999999	C-D
	724022	1683435	1061821	1023555
	754308	1752284	1102287	1034130
	773259	1759494	1119324	1086737
	831299	2058369	1227546	1128184
	859052	2111034	1237866	1139962
	904506	2152408	1265458	1165545
	1014708	2196849	1282325	1175342
	1247793	2344795	1298653	1260583
	1296818	2427995	1302408	1290671
	1536807	2668170	1335809	1316725
	1628367	2795166	1348288	1326197
	1781477	2851485	1367755	1334609
	1861877	3307045	1397845	1379466
	1882387	3452510	1456500	1387211
	1920289	3505328	1488120	1478630
	2131757	3762200	1567085	1498029
	2453343	3777084	1600706	1500419
	2523344	3854287	1664925	1538135
	3806568	4158315	1798583	1593549
	4073895	4826366	1832343	1686078
	96310	5141149	1915497	1701870
	121224	5806336	2065793	1726335
	160021	320747	2246346	1825645
	167936	335842	2499817	1870239
	182732	514860	2535732	1931730
	183860	528533	2943976	2062563
	204070	628289	3167056	2110970
	208047	683165	3248537	2140770
	216372	698836	3303111	2189271
	230312	748639	3410294	2269257
	248991	755306	3550624	2334262
	249334	772907	3624177	2334318
	249366	797220	3782079	2396259
	251365	810856	4013796	2452046
	260796	900821	4026936	2526243
	267495	1130470	4044387	2726893
	276575	1308850	4111549	2735967
	277992	1364880	4507617	2964397
	288032	1371925	4726809	3287486
	295277	1394553	5255660	3462316
	303300	1422010	5424941	4136989
	327990	1823582	6732381	4168430
	329388	2020992	6995307	4299174
	350370	2026403	7253830	5082657
	361805	2055638	7479112	5172524
	369874	2091651	7562102	5841437
	382766	2139199	7666888	5969014
	385372	2171950	9554075	6041852
	434982	3000358	386203	6616265
	449315	3035097	539940	7479532
	458056	3354486	586613	7953702
	487987	3434351	602345	8265916
	495311	3715377	630567	291818
	500824	3970777	690781	326822
	520849	4154414	715708	357175
	547027	4389908	720246	367522
	589391	4585943	736319	415604
	642408	6265265	740124	422977
	726873	123211	744074	529796
	734876	143068	874311	541449
	795302	128543	880825	547261
	797477	180216	923135	629975
	807455	1282364	932683	642561
	840967	286939	951785	643461
	862733	130463	953839	665961
	923595	91864.6	1020565	696132
	932561	458132	1033813	851285
	940198	226520	1081088	864575
	1013543	2023278	1152777	880293
	1146410	533705	1297223	907352
	1323170	819719	1313262	914749
	2549689	1378144	1319621	915516
	2722285	347488	1392572	927887
	256878	625153	1562874	1041867
	309982	886879	1589850	1120884
	218818	559016	1605030	1131820
	436578	843763	1779907	1164729
	185998	1121567	1815108	1196461
	143767	1006225	1923326	1207488
	786906	794152	1965405	1218515
	483107	110653	2010348	1240637
	284483	541146	2041515	1300254
	515723	422566	2326751	1372137
	255269	180204	2337249	1407865
	472938	242027	2392822	1501930
	294466	584475	2498702	1631691
	303158	374680	2604494	1716257
	182772	1763829	3008165	1744748
	155958	1460513	3097306	1793796
	919038	273704	3183334	1877499
	368764	1878412	4052653	1988883
	278944	705189	4177191	2163697
	528068	369326	4829899	2179991
	442148	205480	5217969	2356346
	360379	1356475	6523338	2585469
	190969		6800922	3469778
	391968		7578703	3489035
	164133		8280368	4325722
	810204		9409333	4989694
	270268		9563756	5376752
	367428		2183962	5533865
	242638		1097438	5729630
	350461		1057825	6121423
	101552		560207	6625065
	105121		852880	6911486
	293083		628923	6932837
	277414		616511	8243072
	569928		340416	8608786
	449491		488759	9892196
	225056		405510	616097
	205686		771923	109138
	147144		552355	1999386
	832259		2083236	556382
			330425	1051010
			551708	1123571
			1684181	101055
			383522	474051
			274126	197213
			277544	292350
			2106570	938992
			2260606	320182
			530175	638270
			633383	163132
			454746	1065610
			702434	193318
			465587	446685
			255528	698292
			3067194	299674
			154803	568766
			194376	410654
			216960	339322
			2060104	121485
			254432	668485
			462621	549940
			435793	830961
			1272616	418917
			1399109	1651402
			716634	168629
			709891	735150
				938119
				1101752
				928038
				1252069
				479198
				770440
				221766
